# Supplementary material for: Aolatg1 and Aolatg13 Regulate Autophagy and Play Different Roles in Conidiation, Trap Formation, and Pathogenicity in the Nematode-Trapping Fungus Arthrobotrys oligospora
Source: PubMed Central journal article supplement (PMC8821819; doi:10.3389/fcimb.2021.824407), 2022-01-25
Supplement: DataSheet_1.pdf [file DataSheet_1.pdf]

## Supplementary Materials

**Figure S1. Phylogenetic tree analysis based on the amino acid sequences of Atg homologous proteins from different fungi.** GenBank accession numbers are provided in brackets. The amino acid sequences of Atg proteins were aligned using ClustalX version 1.83, and MEGA 7 was used to construct a neighbor-joining tree, including bootstrap analysis with 1,000 replicates. A. Phylogenetic tree of Atg1 orthologs. B. Phylogenetic tree of Atg13 orthologs.

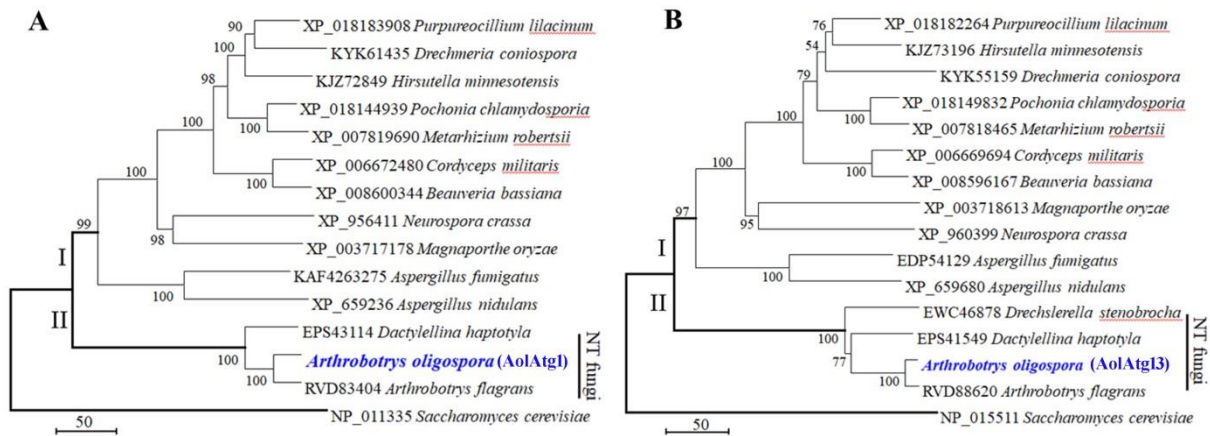

**Figure S2. Schematics of gene knockouts and verification.** A. *Aolatg1* knockout and verification. (a) Diagram of homologous recombination of *Aolatg1* and the homologous flanks of the target gene. (b) PCR confirmation of *Aolatg1* deletion in the transformants. (c) Southern blotting analysis of the WT strain and transformants. B. *Aolatg13* knockout and verification. (a) Diagram of homologous recombination of *Aolatg13* and the homologous flanks of the target gene. (b) PCR confirmation of *Aolatg13* deletion in the transformants. (c) Southern blotting analysis of the WT strain and transformants.

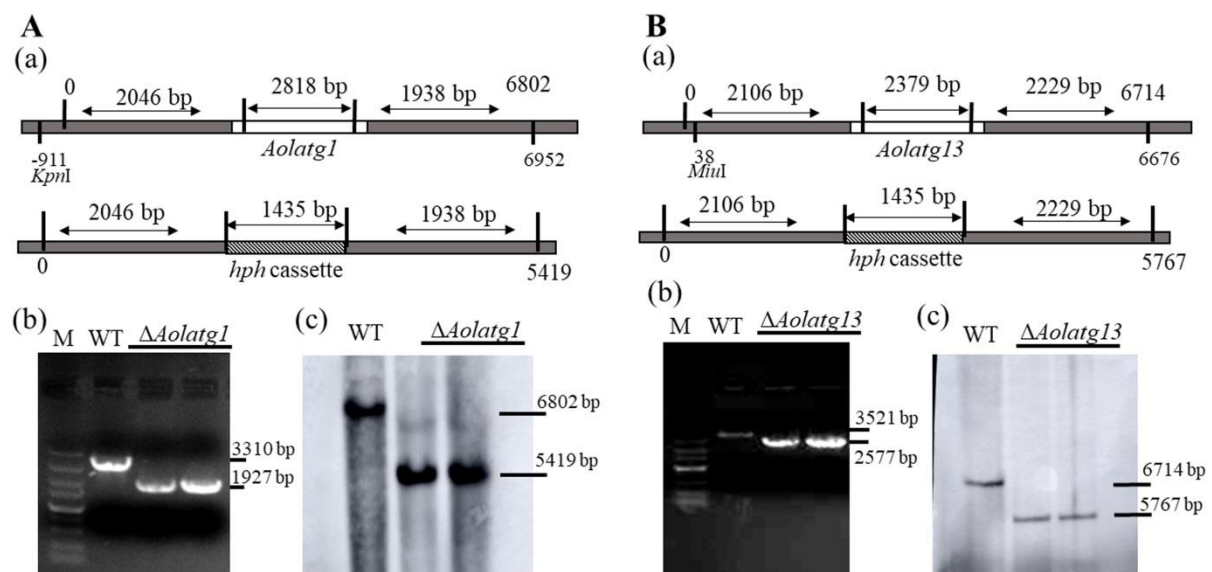

**Figure S3. Comparison of colony morphology and mycelial growth in the WT and mutant strains of *A. oligospora*.** (A) Colony morphology of the WT and mutant strains cultured on PDA, CMY, and TG plates for 6 days at 28 °C. (B) Colony diameters of the WT and mutant strains incubated on PDA, CMY, and TG plates. Data are presented as the mean  $\pm$  standard deviation from three replicates.

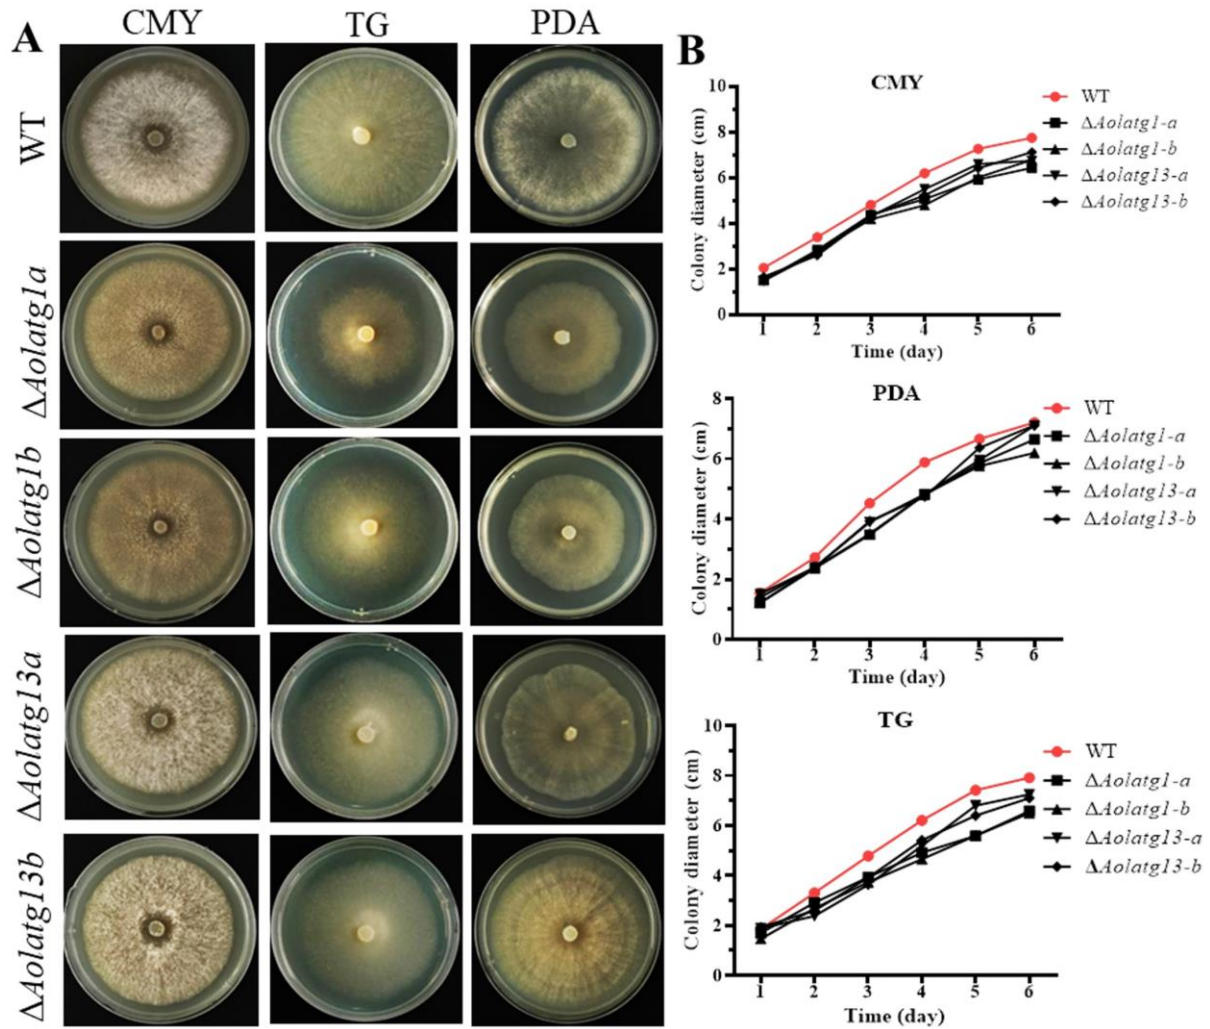

**Figure S4. Comparison of tolerance to NaCl and sorbitol in the WT and mutant strains of *A. oligospora*.** A. Colony morphology of the WT and mutant strains cultured on TG plates or plates containing NaCl and sorbitol. B. Relative growth inhibition (RGI) of the WT and mutant strains cultured on the TG medium containing 0.1–0.3 M NaCl for 6 days. C. RGI of the WT and mutant strains cultured on the TG medium containing 0.3–0.7 M sorbitol for 6 days. Data are presented as the mean  $\pm$  standard deviation. Statistical significance of differences between mutant strains and WT strain is indicated as follows: \* $P < 0.05$  (Tukey's HSD).

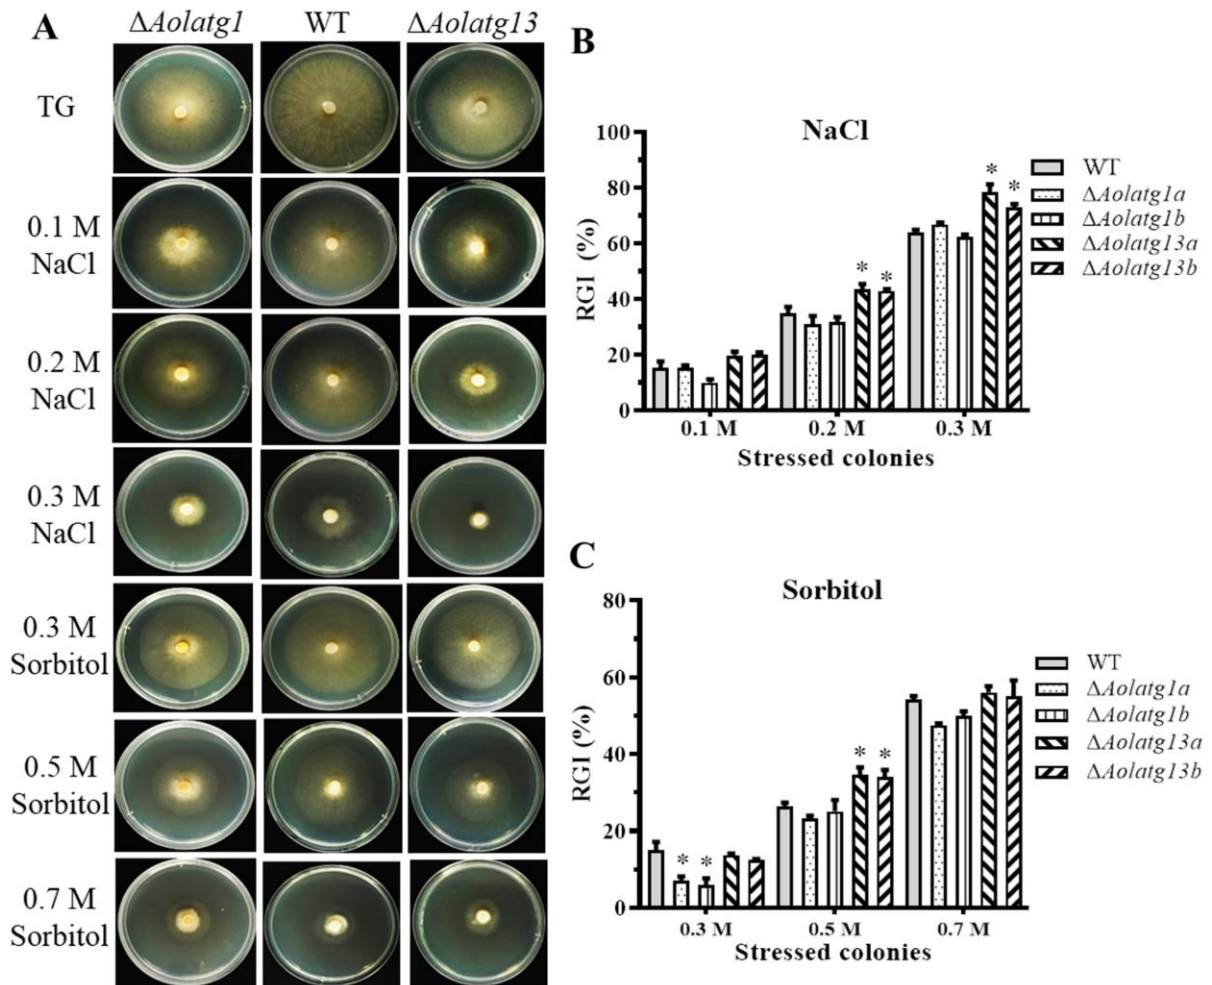

**Figure S5. Principal component analysis (PCA), GO, and KEGG enrichments of the transcriptome.** A. PCA analysis of the WT and  $\Delta Aolatg1$  mutant transcriptomes. WT indicates the wild-type strain, and ATG1 indicates the  $\Delta Aolatg1$  mutant. B. The number of upregulated and downregulated GO terms at 0 h and 24 h. C. The number of upregulated and downregulated KEGG pathways at 0 h and 24 h.

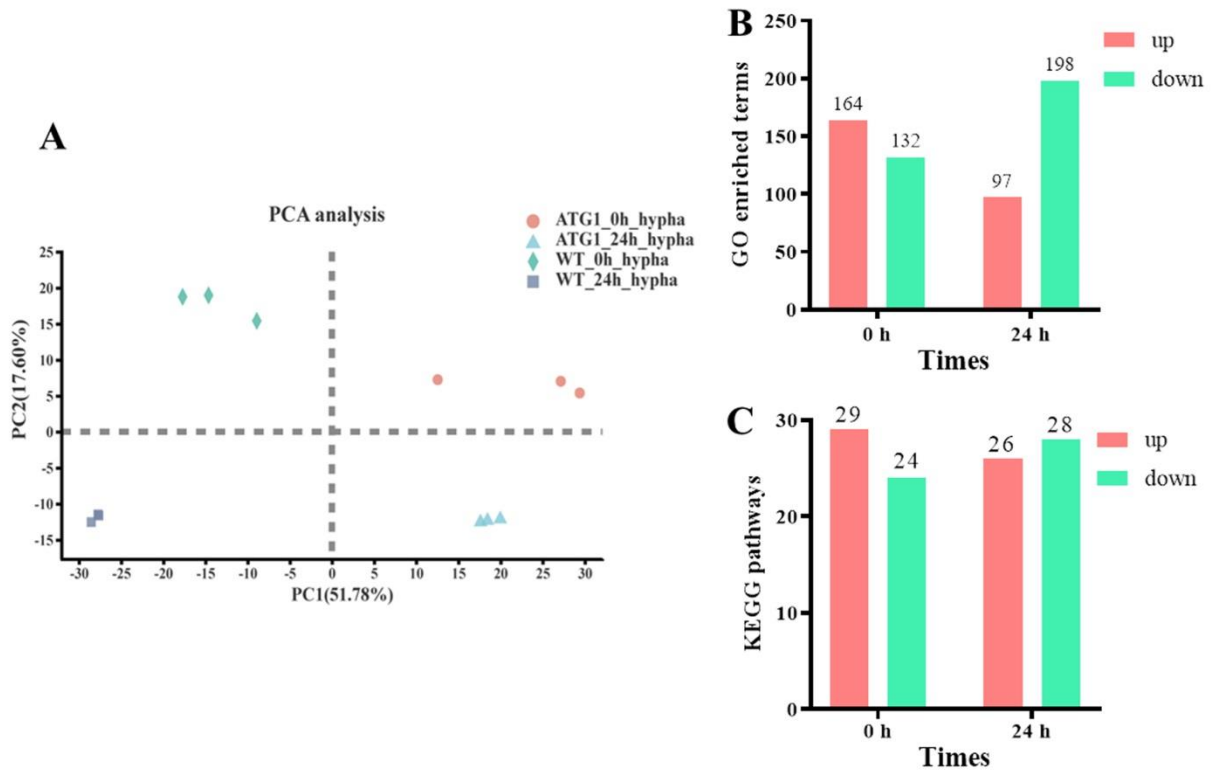

**Figure S6. Gene Ontology (GO) enrichment of the differentially expressed genes (DEGs) in the WT and  $\Delta Aolatg1$  mutant strains of *A. oligospora*.** A. Top 20 of upregulated GO terms enrichment of the WT versus  $\Delta Aolatg1$  mutant samples at 0 h. B. Top 20 of downregulated GO terms enrichment of the WT versus  $\Delta Aolatg1$  mutant samples at 0 h. C. Top 20 of upregulated GO terms enrichment of the WT versus  $\Delta Aolatg1$  mutant samples at 24 h. D. Top 20 of downregulated GO terms enrichment of the WT versus  $\Delta Aolatg1$  mutant samples at 24 h.

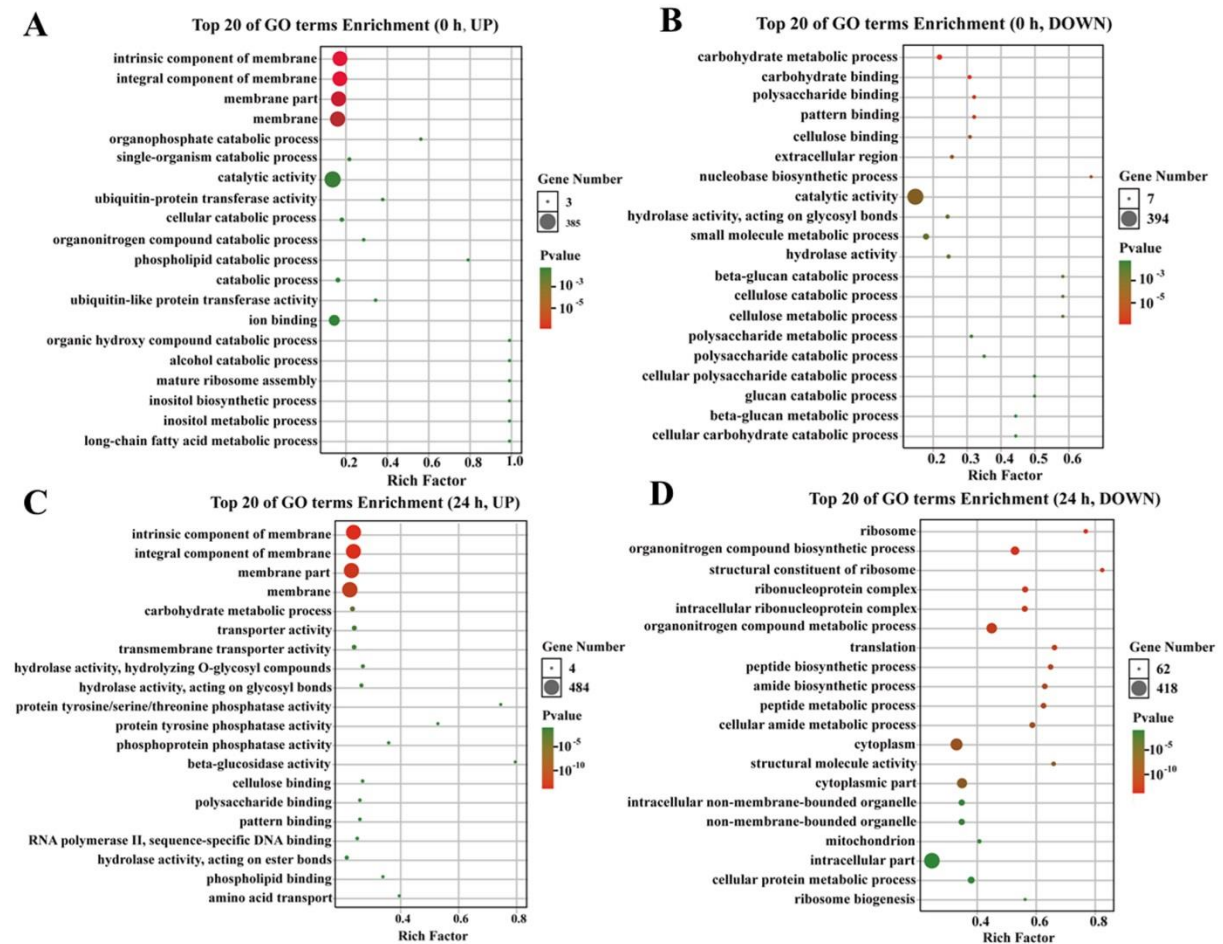

**Figure S7. KEGG enrichment of the differentially expressed genes (DEGs) in the WT and  $\Delta Aolatg1$  mutant strains of *A. oligospora* at 0 h.** A. Top 20 pathways downregulated in the WT versus  $\Delta Aolatg1$  mutant samples at 0 h. B. Annotation of KEGG pathways downregulated in the WT versus  $\Delta Aolatg1$  mutant samples at 0 h.

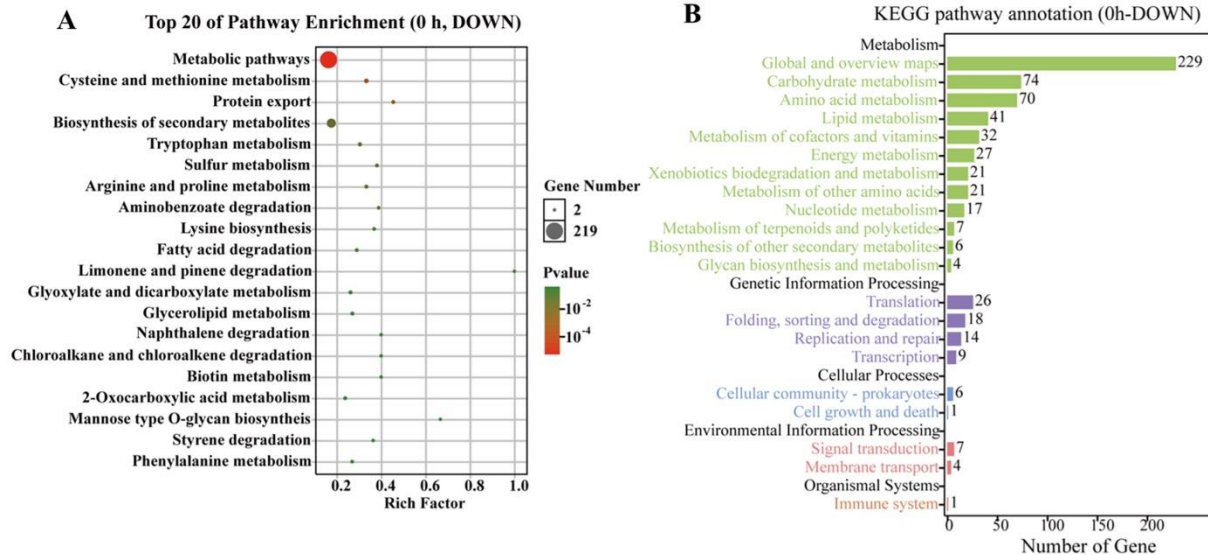

**Figure S8. KEGG enrichment of the differentially expressed genes (DEGs) between the WT and  $\Delta Aolatg1$  mutant strains of *A. oligospora* at 24 h.** A. Top 20 pathways downregulated in the WT versus  $\Delta Aolatg1$  mutant samples at 24 h. B. Annotation of KEGG pathways downregulated in the WT versus  $\Delta Aolatg1$  mutant samples at 24 h.

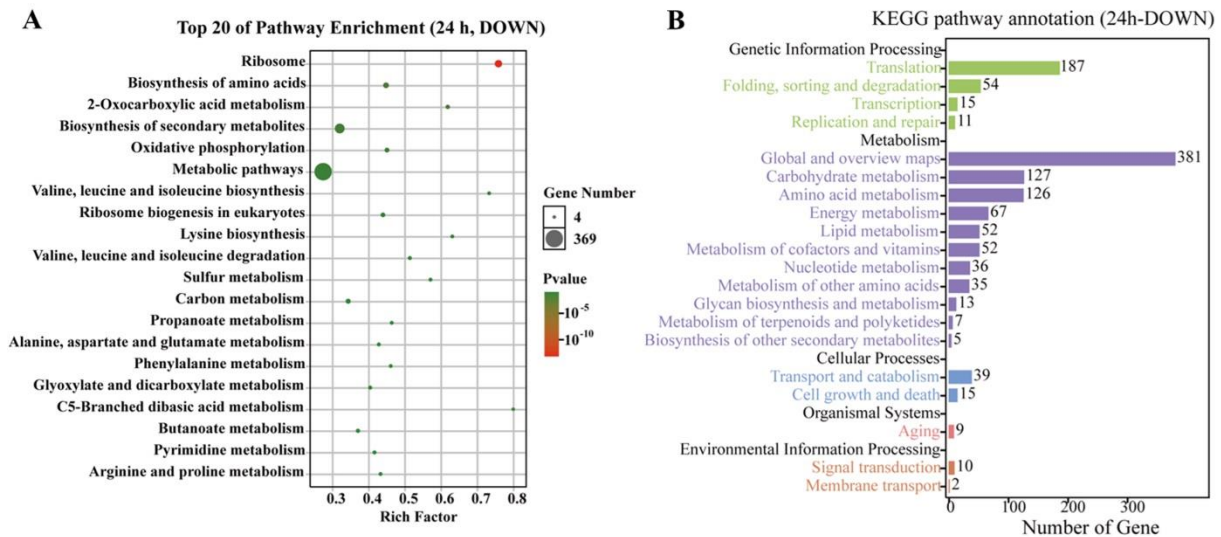

**Table S1. List of primers used for gene manipulation in this study.**

|               |                                                      |                                 |
|---------------|------------------------------------------------------|---------------------------------|
| AolAtg1-5F    | GTAACGCCAGGGTTTTCCAGTCACGACGGAATCCTTTCTCCTGCTCTTTT   | Amplify the <i>Aolatg1</i> gene |
| AolAtg1-5R    | ATCCACTTAACGTTACTGAAATCTCCAACGCCTATTTTCCTTGCCATATCCT | 5' flank                        |
| AolAtg1-3F    | CTCCTTCAATATCATCTTCTGTCTCCGACTATTCTTGGTATCCGTGGGC    | Amplify the <i>Aolatg1</i> gene |
| AolAtg1-3R    | GCGGATAACAATTTACACAGGAAACAGCTTTTGTTCGTGATCTGTTTGT    | 3' flank                        |
| AolAtg13-5F   | GTAACGCCAGGGTTTTCCAGTCACGACGAGGTGCAGGTACGTGTATGA     | Amplify the <i>Aolatg13</i>     |
| AolAtg13-5R   | ATCCACTTAACGTTACTGAAATCTCCAACCACTTCTACAACCGCCACA     | gene 5' flank                   |
| AolAtg13-3F   | CTCCTTCAATATCATCTTCTGTCTCCGACAGTGATAGTCGGTGCTGGTG    | Amplify the <i>Aolatg13</i>     |
| AolAtg13-3R   | GCGGATAACAATTTACACAGGAAACAGCGACTGCGTACTATTGCCGTTA    | gene 3' flank                   |
| Hph-f         | GTCGGAGACAGAAGATGATATTGAAGGAGC                       | Amplify the <i>hph</i> cassette |
| Hph-r         | GTTGGAGATTTACAGTAACGTTAAGTGGAT                       |                                 |
| YZ-ATG1-F     | ATCCTTCTCCTGCTCTTTTG                                 | Verify the transformants        |
| YZ-ATG1-R     | CTCACAGTCAACCAGTTTATCC                               |                                 |
| YZ-ATG13-F    | GCAAGCACAACACTATACAAACCC                             | Verify the transformants        |
| YZ-ATG13-R    | CCACCACTTCCAGCGTTA                                   |                                 |
| Probe-ATG1-F  | AACAATAGTAAACCGCACCCAG                               | Make Southern blotting          |
| Probe-ATG1-R  | CTATGGGTTTTGCTTGGTGT                                 | probe                           |
| Probe-ATG13-F | TCATTTCCCGTCTAATCCTG                                 | Make Southern blotting          |
| Probe-ATG13-R | TCGCCGAGTTGTATCCCT                                   | probe                           |
| AoP-f         | AGGAGGTCAAAGCTTACCAGATACGATTAATCCAGCATCTCACGACC      | Amplify the promoter of         |
| AoP-r         | ATGGTGAGCAAGGGCGAGGAGCTTCATAGATTTGGGTGTCGGTT         | <i>Aoatg8</i>                   |
| Atg8-f        | GTACAGCTCGTCCATGCCGAGAGTGAATGGCACGATCAAAGTT          | Amplify the cDNA of             |
| Atg8-r        | AAGTAAACAATCAATCCATTTTCGCTATTCAGGCAAGGTAC            | gene <i>Aoatg8</i>              |

**Table S2. Primers used for RT-PCR analysis of the sporulation-related genes.**

| Description                      | Gene name                         | Sequence (5'-3')                                            |
|----------------------------------|-----------------------------------|-------------------------------------------------------------|
| <b>Sporulation-related genes</b> | AOL_s00169g18<br>( <i>veA</i> )   | 18-5F-AAGCTACACCCAATCAACGC<br>18-3R-TTGCGATGCTGACGATCTTG    |
|                                  | AOL_s00007g157<br>( <i>flbC</i> ) | 157-5F-CTCTCCGGCAAAGACAATCG<br>157-3R-GTCGACTGAGGATAGTAGCT  |
|                                  | AOL_s00075g211<br>( <i>nsdD</i> ) | 211-5F-ATTACGGCCGCCTAGTAGTC<br>211-3R-CTCGTTTGGACCTGGTTGTG  |
|                                  | AOL_s00043g361<br>( <i>fluG</i> ) | 361-5F-GATTCCAGTCCCCGTGAATTC<br>361-3R-GCTAAGGAGAGGATGGGCAT |
|                                  | AOL_s00006g570<br>( <i>rodA</i> ) | 570-5F-GCGGATCCAACATGAAGCTT<br>570-3R-GGTTGACAACCTGGGATGCTG |
|                                  | AOL_s00080g63<br>( <i>abaA</i> )  | 63-5F-AACTTTATGCGCCTTGTCGT<br>63-3R-TTGGCTAGGTGGTCTGTACG    |
|                                  | AOL_s00054g700<br>( <i>vosA</i> ) | 700-5F-CAAACCACCCACCACCAAAT<br>700-3R-GGATGGACAGGAGAAGGACC  |
|                                  | AOL_s00215g516<br>( <i>flbA</i> ) | 516-5F-TTCAAACGCAGCTCCTTCAC<br>516-5R-AAGCGGGTTGACAGATGAGA  |
|                                  | AOL_s00210g120<br>( <i>medA</i> ) | 120-5F-TCCGGCCCAATGATTCAGAA<br>120-5R-AGATCGCAGGAACATGGTGA  |

|                                   |                                                            |
|-----------------------------------|------------------------------------------------------------|
| AOL_s00097g514<br>( <i>brlA</i> ) | 514-5F-AACTCCATCACCATCCGTAA<br>514-5R-CAGGATATTCGGCACTCA   |
| AOL_s00173g221<br>( <i>wetA</i> ) | 221-5F-CCCTGTGCTACTATTGCTAC<br>221-5R-CCGTTGCGAGCATTCTT    |
| AOL_s00054g811<br>( <i>velB</i> ) | 811-5F-ATTCCGCAACTTCTCCCTCA<br>811-3R-GGCATGTTTGGATTCTGGGG |

|                       |                                  |                                                          |
|-----------------------|----------------------------------|----------------------------------------------------------|
| <b>β-tubulin gene</b> | AOL_s00076g640<br>( <i>tub</i> ) | tubA-F-CCACCTTCGTCGGTAACTC<br>tubA-R-TCGTCCATACCCTCACCAG |
|-----------------------|----------------------------------|----------------------------------------------------------|

**Table S3. Sequence similarity between AolATG1/AolATG13 and orthologs from different fungi.** Sequence similarity of orthologous Atg was analyzed using DNAMAN software.

| Species                          | Similarity to AolAtg1<br>(%) | Similarity to AolAtg13<br>(%) |
|----------------------------------|------------------------------|-------------------------------|
| <i>Arthrotrrys oligospora</i>    | 100                          | 100                           |
| <i>Arthrotrrys flagrans</i>      | 94.2                         | 91.2                          |
| <i>Dactylellina cionopaga</i>    | 86.8                         | 72.7                          |
| <i>Drechslerella stenobrocha</i> | -                            | 73.0                          |
| <i>Aspergillus fumigatus</i>     | 48.6                         | 29.3                          |
| <i>Aspergillus nidulans</i>      | 43.7                         | 29.5                          |
| <i>Purpureocillium lilacinum</i> | 43.5                         | 26.9                          |
| <i>Neurospora crassa</i>         | 42.4                         | 24.4                          |
| <i>Magnaporthe oryzae</i>        | 43.4                         | 23.2                          |
| <i>Pochonia chlamydosporia</i>   | 44.1                         | 25.9                          |
| <i>Hirsutella minnesotensis</i>  | 45.5                         | 26.4                          |
| <i>Metarhizium robertsii</i>     | 43.8                         | 25.5                          |
| <i>Drechmeria coniospora</i>     | 44.2                         | 25.4                          |
| <i>Cordyceps militaris</i>       | 44.8                         | 26.0                          |
| <i>Beauveria bassiana</i>        | 45.0                         | 25.0                          |
| <i>Saccharomyces cerevisiae</i>  | 32.4                         | 10.6                          |

**Table S4. Sequencing data statistics from the transcriptome analysis.**

| Sample     | Total reads | Total mapped     | Multiple mapped | Uniquely mapped  | Raw reads | Raw bases  |
|------------|-------------|------------------|-----------------|------------------|-----------|------------|
| ATG1_0h_1  | 52341788    | 50735512(96.93%) | 191235(0.37%)   | 50544277(96.57%) | 52946894  | 7994980994 |
| ATG1_0h_2  | 52344310    | 50703965(96.87%) | 188401(0.36%)   | 50515564(96.51%) | 52808984  | 7974156584 |
| ATG1_0h_3  | 53624344    | 51847772(96.69%) | 197465(0.37%)   | 51650307(96.32%) | 54200806  | 8184321706 |
| ATG1_24h_1 | 51311728    | 30379398(59.21%) | 97367(0.19%)    | 30282031(59.02%) | 51670210  | 7802201710 |
| ATG1_24h_2 | 56392234    | 25567803(45.34%) | 79045(0.14%)    | 25488758(45.2%)  | 56840660  | 8582939660 |
| ATG1_24h_3 | 55855454    | 27584228(49.39%) | 85956(0.15%)    | 27498272(49.23%) | 56392760  | 8515306760 |
| WT_0h_1    | 46898482    | 45416135(96.84%) | 183226(0.39%)   | 45232909(96.45%) | 47509132  | 7173878932 |
| WT_0h_2    | 46964880    | 45600127(97.09%) | 183498(0.39%)   | 45416629(96.7%)  | 47471022  | 7168124322 |
| WT_0h_3    | 50482982    | 48890863(96.85%) | 192894(0.38%)   | 48697969(96.46%) | 50953732  | 7694013532 |



| WT_24h_1      | 51387924           | 30866871(60.07%)   | 101070(0.2%)          | 30765801(59.87%) | 51783536       | 7819313936           |
|---------------|--------------------|--------------------|-----------------------|------------------|----------------|----------------------|
| WT_24h_2      | 49958832           | 28950733(57.95%)   | 89782(0.18%)          | 28860951(57.77%) | 50356978       | 7603903678           |
| WT_24h_3      | 49840398           | 25559605(51.28%)   | 74186(0.15%)          | 25485419(51.13%) | 50263842       | 7589840142           |
| <b>Sample</b> | <b>Clean reads</b> | <b>Clean bases</b> | <b>Error rate (%)</b> | <b>Q20 (%)</b>   | <b>Q30 (%)</b> | <b>GC content(%)</b> |
| ATG1_0h_1     | 52341788           | 7760699009         | 0.0277                | 97.1             | 91.54          | 47.96                |
| ATG1_0h_2     | 52344310           | 7776548505         | 0.0272                | 97.32            | 91.95          | 47.97                |
| ATG1_0h_3     | 53624344           | 7974658396         | 0.0275                | 97.18            | 91.68          | 48.02                |
| ATG1_24h_1    | 51311728           | 7643687922         | 0.0262                | 97.66            | 92.8           | 49.7                 |
| ATG1_24h_2    | 56392234           | 8371018602         | 0.0264                | 97.58            | 92.63          | 50.31                |
| ATG1_24h_3    | 55855454           | 8310953513         | 0.0273                | 97.28            | 91.89          | 50.33                |
| WT_0h_1       | 46898482           | 6938431303         | 0.0272                | 97.28            | 91.92          | 47.73                |
| WT_0h_2       | 46964880           | 6978104784         | 0.027                 | 97.37            | 92.09          | 47.97                |
| WT_0h_3       | 50482982           | 7492817315         | 0.027                 | 97.37            | 92.12          | 47.97                |
| WT_24h_1      | 51387924           | 7668437697         | 0.0266                | 97.53            | 92.5           | 49.95                |
| WT_24h_2      | 49958832           | 7434888729         | 0.0266                | 97.54            | 92.5           | 50.05                |
| WT_24h_3      | 49840398           | 7395201495         | 0.0261                | 97.69            | 92.91          | 50.33                |
